# Supplementary material for: Linking adipose tissue eosinophils, IL-4, and leptin in human obesity and insulin resistance
Source: PubMed Central journal article supplement (PMC10967463; doi:10.1172/jci.insight.170772), 2024-02-08
Supplement: jciinsight-9-170772-s104.pdf [file jciinsight-9-170772-s104.pdf]

**Supplemental table S1.** Antibodies used for flow cytometry in tissue and blood

| Antigen                            | Fluorochrome    | Vendor        | Clone    | Catalog    |
|------------------------------------|-----------------|---------------|----------|------------|
| Live/dead                          | UV 455          | Invitrogen    | None     | 65-0868-14 |
| CD45                               | APC             | BD Pharmingen | H130     | 555485     |
| CD45                               | Alexa Fluor 488 | BioLegend     | HI30     | 304017     |
| CD14                               | FITC            | BD Pharmingen | M5E2     | 555397     |
| CD16                               | eFluor 450      | Invitrogen    | eBioCB16 | 48-0168-42 |
| CD66b                              | PE-Cy7          | Invitrogen    | G10F5    | 25-0666-42 |
| Siglec-8                           | PE              | BioLegend     | 7C9      | 347104     |
| EMR1                               | RPE             | Bio-Rad       | A10      | MCA2674PE  |
| CD193*                             | APC             | BioLegend     | 5E8      | 310708     |
| Rat IgG1, $\kappa$ Isotype Control | APC             | BD Pharmingen | R3-34    | 554686     |

\* Antibody used only in flow cytometry with blood samples.

**Supplemental table S2.** Primers used for RT-PCR

| Genes  | Primer sequences (5' -> 3')              |
|--------|------------------------------------------|
| ACTB   | Forward Primer: AAACTGGAACGGTGAAGGTG     |
|        | Reverse Primer: AGAGAAGTGGGGTGGCTTTT     |
| ADIPOQ | Forward Primer: TGCTGGGAGCTGTTCTACTG     |
|        | Reverse Primer: TACTCCGGTTTCACCGATGTC    |
| CCL11  | Forward Primer: CCCCTTCAGCGACTAGAGAG     |
|        | Reverse Primer: TCTTGGGGTCCGGCACAGAT     |
| CCL24  | Forward Primer: GGAGTGGGTCCAGAGGTACAT    |
|        | Reverse Primer: CAGGTGGTTTGGTTGCCAG      |
| CCL26  | Forward Primer: AGTCACAATTGTTTCGGAGTT    |
|        | Reverse Primer: AGTCTCCACCTTGAACTG       |
| CCR3   | Forward Primer: TGGCATGTGTAAGCTCCTCTC    |
|        | Reverse Primer: CCTGTGATTGTCAGCAGGATTA   |
| CD68   | Forward Primer: GCTACATGGCGGTGGAGTACAA   |
|        | Reverse Primer: ATGATGAGAGGCAGCAAGATGG   |
| CD163  | Forward Primer: CGGCTGCCTCCACCTCTAAGT    |
|        | Reverse Primer: ATGAAGATGCTGGCGTGACA     |
| EPX    | Forward Primer: CACGGTTTCAAGGGACATC      |
|        | Reverse Primer: CTTTTCTTGCCTGGGGTG       |
| IL1B   | Forward Primer: ATGATGGCTTATTACAGTGGCAA  |
|        | Reverse Primer: TCGGAGATTCTAGCTGGA       |
| IL4    | Forward Primer: ATGGGTCTCACCTCCCAACT     |
|        | Reverse Primer: GATGTCTGTTACGGTCAACTCG   |
| IL6    | Forward Primer: ACTCACCTCTTCAGAACGAATTG  |
|        | Reverse Primer: CCATCTTTGGAAGGTTTCAGGTTG |
| NOS2   | Forward Primer: AGGGACAAGCCTACCCCTC      |
|        | Reverse Primer: CTCATCTCCCGTCAGTTGGT     |
| LEP    | Forward Primer: CACACGCAGTCAGTCTCCTC     |
|        | Reverse Primer: AGGTTCTCCAGGTCGTTGG      |
| CCL2   | Forward Primer: AGTCTCTGCCGCCCTTCTGTG    |
|        | Reverse Primer: CATCTGGCTGAGCGAGCCC      |
| TNF    | Forward Primer: GAGGCCAAGCCCTGGTATG      |
|        | Reverse Primer: CGGGCCGATTGATCTCAGC      |

A

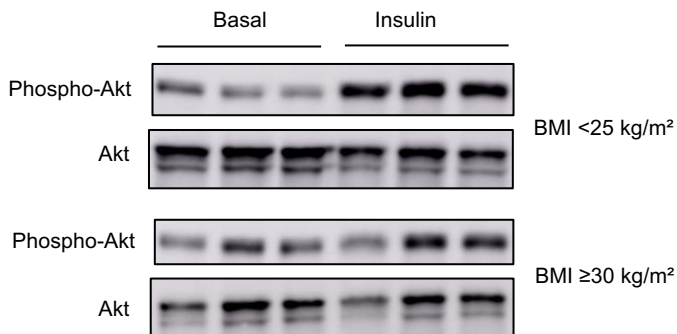

B

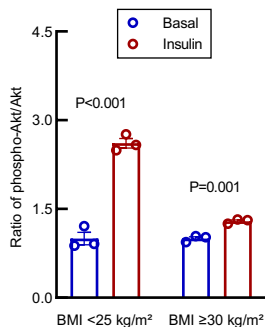

C

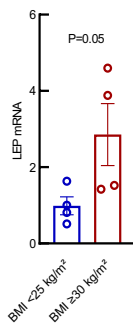

**Supplemental figure S1. Insulin signaling and *LEP* mRNA levels in primary human adipocytes collected from subjects with BMI<25 kg/m<sup>2</sup> and BMI≥ 30 kg/m<sup>2</sup>.** (A) Representative immunoblot of Akt and phospho-AKT after in vitro insulin treatment (100nM for 15 mins) in primary mature adipocytes collected from subjects with BMI<25 kg/m<sup>2</sup> or BMI≥ 30 kg/m<sup>2</sup>, respectively. (B) Quantification of phospho-Akt/Akt ratio from (A). Primary mature adipocytes from subjects with BMI<25 kg/m<sup>2</sup> display greater phosphorylation of Akt compared to adipocytes from subjects with BMI≥30 kg/m<sup>2</sup>. (C) *LEP* mRNA expression is increased in primary mature adipocytes from subjects with BMI≥ 30 kg/m<sup>2</sup> compared to adipocytes from subjects with BMI< 25kg/m<sup>2</sup>. Y-axis = relative fold change ( $2^{-\Delta\Delta Ct}$ ). Data were analyzed by unpaired 2-tailed t test and expressed as mean ± SEM.

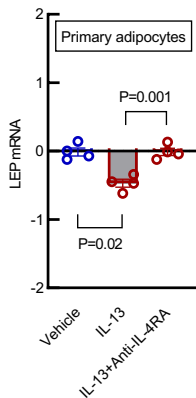

**Supplemental figure S2. IL-13 decreases *LEP* mRNA expression in primary human adipocytes in vitro.** *LEP* mRNA levels in mature human subcutaneous primary adipocytes collected from individuals with BMI  $\geq$  30 kg/m<sup>2</sup> was significantly reduced after 24 hrs of IL-13 (20 ng/ml) treatment (n=4). The response was blunted by co-incubation of IL-4R alpha antibody (Anti-IL-4RA 2.5ng/ml for 24 hrs) (n=4). Y-axis = relative fold change ( $2^{-\Delta\Delta C_t}$ ). Data were analyzed by unpaired 2-tailed t test and expressed as mean  $\pm$  SEM.
