# Supplementary material for: Linking adipose tissue eosinophils, IL-4, and leptin in human obesity and insulin resistance
Source: PubMed Central journal article supplement (PMC10967463; doi:10.1172/jci.insight.170772), 2024-02-08
Supplement: jciinsight-9-170772-s106.pdf [file jciinsight-9-170772-s106.pdf]

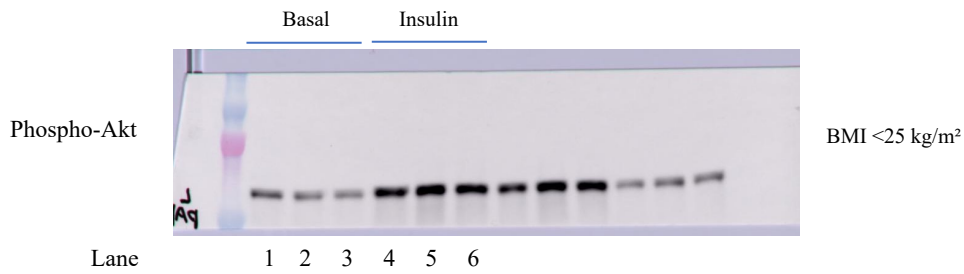

Lane 1-6 were used for the manuscript figure. Other lanes are unrelated.

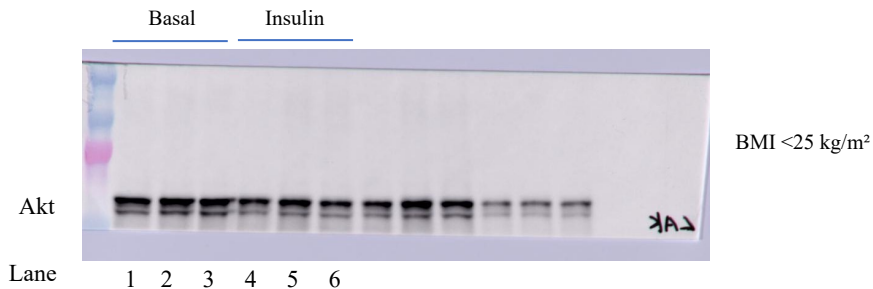

Lane 1-6 were used for the manuscript figure. Other lanes are unrelated.

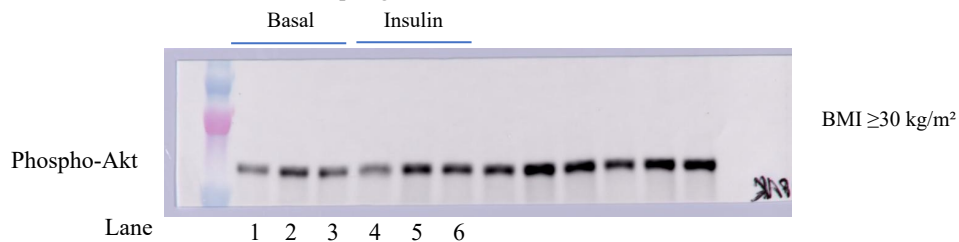

Lane 1-6 were used for the manuscript figure. Other lanes are unrelated.

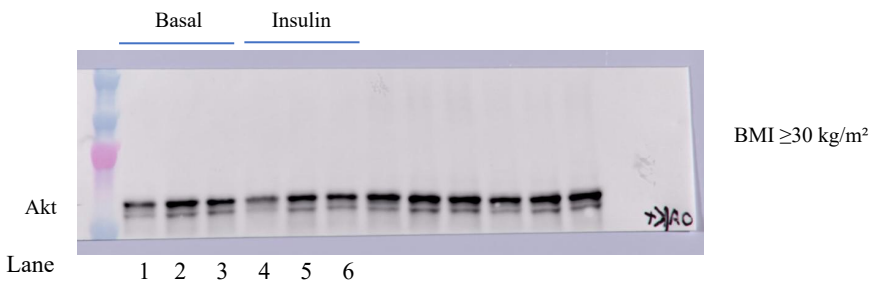

Lane 1-6 were used for the manuscript figure. Other lanes are unrelated.

All gels presented here are full unedited blots used in Figure S1A
